# Supplementary material for: The Small Molecule PPARγ Agonist GL516 Induces Feeding-Stimulatory Effects in Hypothalamus Cells Hypo-E22 and Isolated Hypothalami
Source: MDPI journal article supplement (doi:10.3390/molecules27154882), 2022-07-30
Supplement: s1 [file s1]

SwissTargetPrediction

| Target                                                     | Common name   | Uniprot ID    | ChEMBL ID     | Target Class                        | Probability* | Known actives (3D/2D) |
|------------------------------------------------------------|---------------|---------------|---------------|-------------------------------------|--------------|-----------------------|
| T1R1/T1R3_UNCURATED                                        | TAS1R3 TAS1R1 | Q7RTX0 Q7RTX1 | CHEMBL3832641 | Family C G protein-coupled receptor | 0,153290397  | 0 / 1                 |
| Peroxisome proliferator-activated receptor gamma           | PPARG         | P37231        | CHEMBL235     | Nuclear receptor                    | 0,113285953  | 979 / 49              |
| Peroxisome proliferator-activated receptor alpha           | PPARA         | Q07869        | CHEMBL239     | Nuclear receptor                    | 0,113285953  | 590 / 48              |
| Aldose reductase                                           | AKR1B1        | P15121        | CHEMBL1900    | Enzyme                              | 0,113285953  | 370 / 0               |
| Carnitine O-palmitoyltransferase 1, liver isoform          | CPT1A         | P50416        | CHEMBL1293194 | Enzyme                              | 0,113285953  | 198 / 0               |
| Carnitine O-palmitoyltransferase 1, muscle isoform         | CPT1B         | Q92523        | CHEMBL2216739 | Group translocator                  | 0,113285953  | 136 / 0               |
| Angiotensin-converting enzyme                              | ACE           | P12821        | CHEMBL1808    | Protease                            | 0,113285953  | 394 / 0               |
| 5-lipoxygenase activating protein                          | ALOX5AP       | P20292        | CHEMBL4550    | Other cytosolic protein             | 0,113285953  | 242 / 0               |
| Neprilysin                                                 | MME           | P08473        | CHEMBL1944    | Protease                            | 0,113285953  | 340 / 0               |
| Carboxypeptidase A1                                        | CPA1          | P15085        | CHEMBL2088    | Protease                            | 0,113285953  | 19 / 0                |
| Angiotensin-converting enzyme 2                            | ACE2          | Q9BYF1        | CHEMBL3736    | Protease                            | 0,113285953  | 40 / 0                |
| Kelch-like ECH-associated protein 1                        | KEAP1         | Q14145        | CHEMBL2069156 | Unclassified protein                | 0,113285953  | 12 / 0                |
| Matrix metalloproteinase 2                                 | MMP2          | P08253        | CHEMBL333     | Protease                            | 0,113285953  | 292 / 0               |
| Carboxypeptidase B                                         | CPB1          | P15086        | CHEMBL2552    | Protease                            | 0,113285953  | 17 / 0                |
| Liver glycogen phosphorylase                               | PYGL          | P06737        | CHEMBL2568    | Enzyme                              | 0,113285953  | 135 / 0               |
| Signal transducer and activator of transcription 3 (STAT3) | STAT3         | P40763        | CHEMBL4026    | Transcription factor                | 0,113285953  | 18 / 0                |
| Phospholipase A2 group 1B                                  | PLA2G1B       | P04054        | CHEMBL4426    | Enzyme                              | 0,113285953  | 59 / 0                |
| Lysosomal protective protein                               | CTSA          | P10619        | CHEMBL6115    | Protease                            | 0,113285953  | 370 / 0               |
| Neurotensin receptor 1                                     | NTSR1         | P30989        | CHEMBL4123    | Family A G protein-coupled receptor | 0,113285953  | 28 / 0                |
| Integrin alpha-4/beta-1                                    | ITGB1 ITGA4   | P05556 P13612 | CHEMBL1907599 | Membrane receptor                   | 0,113285953  | 646 / 0               |
| Phosphodiesterase 4B                                       | PDE4B         | Q07343        | CHEMBL275     | Phosphodiesterase                   | 0,113285953  | 141 / 0               |
| Phosphodiesterase 4D                                       | PDE4D         | Q08499        | CHEMBL288     | Phosphodiesterase                   | 0,113285953  | 107 / 0               |
| Matrix metalloproteinase 9                                 | MMP9          | P14780        | CHEMBL321     | Protease                            | 0,113285953  | 131 / 0               |
| Casein kinase II alpha                                     | CSNK2A1       | P68400        | CHEMBL3629    | Kinase                              | 0,113285953  | 149 / 0               |
| Leukocyte elastase                                         | ELANE         | P08246        | CHEMBL248     | Protease                            | 0,113285953  | 40 / 2                |
| p53-binding protein Mdm-2                                  | MDM2          | Q00987        | CHEMBL5023    | Other nuclear protein               | 0,113285953  | 181 / 0               |
| Dihydroorotate dehydrogenase                               | DHODH         | Q02127        | CHEMBL1966    | Oxidoreductase                      | 0,113285953  | 281 / 0               |
| Endothelin receptor ET-A (by homology)                     | EDNRA         | P25101        | CHEMBL252     | Family A G protein-coupled receptor | 0,113285953  | 468 / 0               |
| Glycogen synthase kinase-3 beta                            | GSK3B         | P49841        | CHEMBL262     | Kinase                              | 0,113285953  | 88 / 0                |
| Free fatty acid receptor 1                                 | FFAR1         | O14842        | CHEMBL4422    | Family A G protein-coupled receptor | 0,113285953  | 223 / 0               |
| Chymase                                                    | CMA1          | P23946        | CHEMBL4068    | Protease                            | 0,113285953  | 124 / 0               |
| Cathepsin G                                                | CTSG          | P08311        | CHEMBL4071    | Protease                            | 0,113285953  | 15 / 0                |
| Hexokinase type IV                                         | GCK           | P35557        | CHEMBL3820    | Enzyme                              | 0,113285953  | 43 / 0                |
| Sodium channel protein type X alpha subunit (by homology)  | SCN10A        | Q9Y5Y9        | CHEMBL5451    | Voltage-gated ion channel           | 0,113285953  | 28 / 0                |
| Carnitine palmitoyltransferase 2                           | CPT2          | P23786        | CHEMBL3238    | Enzyme                              | 0,113285953  | 62 / 0                |
| Caspase-1                                                  | CASP1         | P29466        | CHEMBL4801    | Protease                            | 0,113285953  | 221 / 0               |
| Endothelin receptor ET-B                                   | EDNRB         | P24530        | CHEMBL1785    | Family A G protein-coupled receptor | 0,113285953  | 171 / 0               |
| Integrin alpha-V/beta-3                                    | ITGAV ITGB3   | P06756 P05106 | CHEMBL1907598 | Membrane receptor                   | 0,113285953  | 318 / 0               |

|                                                        |             |               |               |                                     |             |         |
|--------------------------------------------------------|-------------|---------------|---------------|-------------------------------------|-------------|---------|
| Protein farnesyltransferase                            | FNTA FNTB   | P49354 P49356 | CHEMBL2094108 | Enzyme                              | 0,113285953 | 110 / 0 |
| Integrin alpha-V/beta-5                                | ITGB5 ITGAV | P18084 P06756 | CHEMBL2096675 | Membrane receptor                   | 0,113285953 | 30 / 0  |
| Integrin alpha-V/beta-1                                | ITGAV ITGB1 | P06756 P05556 | CHEMBL2111407 | Membrane receptor                   | 0,113285953 | 7 / 0   |
| Integrin alpha-V/beta-6                                | ITGAV ITGB6 | P06756 P18564 | CHEMBL2111416 | Membrane receptor                   | 0,113285953 | 8 / 0   |
| Dual specificity protein phosphatase 3                 | DUSP3       | P51452        | CHEMBL2635    | Phosphatase                         | 0,113285953 | 34 / 0  |
| Matrix metalloproteinase 13                            | MMP13       | P45452        | CHEMBL280     | Protease                            | 0,113285953 | 234 / 0 |
| Matrix metalloproteinase 3                             | MMP3        | P08254        | CHEMBL283     | Protease                            | 0,113285953 | 157 / 0 |
| Sn1-specific diacylglycerol lipase alpha               | DAGLA       | Q9Y4D2        | CHEMBL5545    | Enzyme                              | 0,113285953 | 18 / 0  |
| Integrin alpha-4/beta-7                                | ITGB7 ITGA4 | P26010 P13612 | CHEMBL2095184 | Membrane receptor                   | 0,113285953 | 209 / 0 |
| Aldehyde reductase                                     | AKR1A1      | P14550        | CHEMBL2246    | Enzyme                              | 0,113285953 | 18 / 0  |
| ADAMTS5                                                | ADAMTS5     | Q9UNA0        | CHEMBL2285    | Protease                            | 0,113285953 | 96 / 0  |
| Autotaxin                                              | ENPP2       | Q13822        | CHEMBL3691    | Enzyme                              | 0,113285953 | 37 / 0  |
| Matrix metalloproteinase 14                            | MMP14       | P50281        | CHEMBL3869    | Protease                            | 0,113285953 | 59 / 0  |
| Matrix metalloproteinase 12                            | MMP12       | P39900        | CHEMBL4393    | Protease                            | 0,113285953 | 102 / 0 |
| Phosphodiesterase 10A                                  | PDE10A      | Q9Y233        | CHEMBL4409    | Phosphodiesterase                   | 0,113285953 | 44 / 0  |
| Matrix metalloproteinase 8                             | MMP8        | P22894        | CHEMBL4588    | Protease                            | 0,113285953 | 130 / 0 |
| Neurokinin 2 receptor                                  | TACR2       | P21452        | CHEMBL2327    | Family A G protein-coupled receptor | 0,113285953 | 5 / 0   |
| Integrin alpha2/beta1                                  | ITGB1 ITGA2 | P05556 P17301 | CHEMBL3137268 | Unclassified protein                | 0,113285953 | 30 / 0  |
| Heat shock protein HSP 90-alpha                        | HSP90AA1    | P07900        | CHEMBL3880    | Other cytosolic protein             | 0,113285953 | 21 / 0  |
| Neurokinin 3 receptor                                  | TACR3       | P29371        | CHEMBL4429    | Family A G protein-coupled receptor | 0,113285953 | 3 / 0   |
| Bone morphogenetic protein 1                           | BMP1        | P13497        | CHEMBL3898    | Protease                            | 0,113285953 | 18 / 0  |
| Oxoeicosanoid receptor 1                               | OXER1       | Q8TDS5        | CHEMBL1628461 | Family A G protein-coupled receptor | 0,113285953 | 4 / 0   |
| c-Jun N-terminal kinase 1                              | MAPK8       | P45983        | CHEMBL2276    | Kinase                              | 0,113285953 | 38 / 0  |
| MAP kinase signal-integrating kinase 2                 | MKNK2       | Q9HBB9        | CHEMBL4204    | Kinase                              | 0,113285953 | 26 / 0  |
| 6-phosphofructo-2-kinase/fructose-2,6-bisphosphatase   | PFKFB3      | Q16875        | CHEMBL2331053 | Enzyme                              | 0,113285953 | 18 / 0  |
| Matrix metalloproteinase 1                             | MMP1        | P03956        | CHEMBL332     | Protease                            | 0,113285953 | 89 / 0  |
| Protein-tyrosine phosphatase 1B                        | PTPN1       | P18031        | CHEMBL335     | Phosphatase                         | 0,113285953 | 212 / 0 |
| Receptor-type tyrosine-protein phosphatase F (LAR)     | PTPRF       | P10586        | CHEMBL3521    | Membrane receptor                   | 0,113285953 | 34 / 0  |
| T-cell protein-tyrosine phosphatase                    | PTPN2       | P17706        | CHEMBL3807    | Phosphatase                         | 0,113285953 | 56 / 0  |
| PI3-kinase p110-alpha subunit                          | PIK3CA      | P42336        | CHEMBL4005    | Enzyme                              | 0,113285953 | 51 / 0  |
| Steroid 5-alpha-reductase 2                            | SRD5A2      | P31213        | CHEMBL1856    | Oxidoreductase                      | 0,113285953 | 66 / 0  |
| Receptor-type tyrosine-protein phosphatase beta        | PTPRB       | P23467        | CHEMBL2706    | Phosphatase                         | 0,113285953 | 3 / 0   |
| Integrin alpha-4                                       | ITGA4       | P13612        | CHEMBL278     | Membrane receptor                   | 0,113285953 | 106 / 0 |
| Glycogen synthase kinase-3 alpha                       | GSK3A       | P49840        | CHEMBL2850    | Kinase                              | 0,113285953 | 20 / 0  |
| Protein-tyrosine phosphatase 1C                        | PTPN6       | P29350        | CHEMBL3166    | Phosphatase                         | 0,113285953 | 11 / 0  |
| Protein-tyrosine phosphatase G1                        | PTPN12      | Q05209        | CHEMBL3236    | Phosphatase                         | 0,113285953 | 2 / 0   |
| Leukocyte common antigen                               | PTPRC       | P08575        | CHEMBL3243    | Enzyme                              | 0,113285953 | 15 / 0  |
| Serine/threonine-protein kinase Aurora-A               | AURKA       | O14965        | CHEMBL4722    | Kinase                              | 0,113285953 | 71 / 0  |
| Prostanoid EP4 receptor                                | PTGER4      | P35408        | CHEMBL1836    | Family A G protein-coupled receptor | 0,113285953 | 235 / 0 |
| Peptidyl-prolyl cis-trans isomerase NIMA-interacting 1 | PIN1        | Q13526        | CHEMBL2288    | Enzyme                              | 0,113285953 | 57 / 0  |

|                                                    |             |               |               |                                     |             |        |
|----------------------------------------------------|-------------|---------------|---------------|-------------------------------------|-------------|--------|
| Chymotrypsin C                                     | CTRC        | Q99895        | CHEMBL2386    | Protease                            | 0,113285953 | 3 / 0  |
| Metabotropic glutamate receptor 2 (by homology)    | GRM2        | Q14416        | CHEMBL5137    | Family C G protein-coupled receptor | 0,113285953 | 19 / 0 |
| Transient receptor potential cation channel subfam | TRPM8       | Q7Z2W7        | CHEMBL1075319 | Voltage-gated ion channel           | 0,113285953 | 91 / 0 |
| Integrin alpha-5/beta-1                            | ITGB1 ITGA5 | P05556 P08648 | CHEMBL2095226 | Membrane receptor                   | 0,113285953 | 39 / 0 |
| Bromodomain-containing protein 4                   | BRD4        | O60885        | CHEMBL1163125 | Reader                              | 0,113285953 | 15 / 0 |
| Replication protein A 70 kDa DNA-binding subunit   | RPA1        | P27694        | CHEMBL1764940 | Unclassified protein                | 0,113285953 | 20 / 0 |
| Epidermal growth factor receptor erbB1             | EGFR        | P00533        | CHEMBL203     | Kinase                              | 0,113285953 | 61 / 0 |
| Fatty acid binding protein adipocyte               | FABP4       | P15090        | CHEMBL2083    | Fatty acid binding protein family   | 0,113285953 | 81 / 0 |
| Cyclin-dependent kinase 9                          | CDK9        | P50750        | CHEMBL3116    | Kinase                              | 0,113285953 | 14 / 0 |
| Fatty acid binding protein muscle                  | FABP3       | P05413        | CHEMBL3344    | Fatty acid binding protein family   | 0,113285953 | 33 / 0 |
| Fatty acid binding protein epidermal               | FABP5       | Q01469        | CHEMBL3674    | Fatty acid binding protein family   | 0,113285953 | 15 / 0 |
| Bradykinin B1 receptor                             | BDKRB1      | P46663        | CHEMBL4308    | Family A G protein-coupled receptor | 0,113285953 | 4 / 0  |
| 3-phosphoinositide dependent protein kinase-1      | PDPK1       | O15530        | CHEMBL2534    | Kinase                              | 0,113285953 | 5 / 0  |
| Gonadotropin-releasing hormone receptor            | GNRHR       | P30968        | CHEMBL1855    | Family A G protein-coupled receptor | 0,113285953 | 13 / 0 |
| Epoxide hydratase                                  | EPHX2       | P34913        | CHEMBL2409    | Protease                            | 0,113285953 | 87 / 0 |
| Nerve growth factor receptor Trk-A                 | NTRK1       | P04629        | CHEMBL2815    | Kinase                              | 0,113285953 | 17 / 0 |
| Phosphoglycerate kinase 1                          | PGK1        | P00558        | CHEMBL2886    | Enzyme                              | 0,113285953 | 2 / 0  |
| Vitronectin receptor alpha                         | ITGAV       | P06756        | CHEMBL3660    | Membrane receptor                   | 0,113285953 | 30 / 0 |
| L-lactate dehydrogenase A chain                    | LDHA        | P00338        | CHEMBL4835    | Enzyme                              | 0,113285953 | 51 / 0 |
| L-lactate dehydrogenase B chain                    | LDHB        | P07195        | CHEMBL4940    | Enzyme                              | 0,113285953 | 18 / 0 |
| Egl nine homolog 3                                 | EGLN3       | Q9H6Z9        | CHEMBL5705    | Enzyme                              | 0,113285953 | 1 / 0  |
| Lysine-specific demethylase 2A                     | KDM2A       | Q9Y2K7        | CHEMBL1938210 | Eraser                              | 0,113285953 | 24 / 0 |
